# Supplementary material for: An asymmetric wettable chitosan–silk fibroin composite dressing with fixed silver nanoparticles for infected wound repair: in vitro and in vivo evaluation
Source: Royal Society of Chemistry journal article supplement (doi:10.1039/c7ra07588j), 2017-01-01
Supplement: c7ra07588j1.pdf [file c7ra07588j1.pdf]

**ANOVA (24h)**

Silver content

|                | Sum of Squares | df | Mean Square | F    | Sig. |
|----------------|----------------|----|-------------|------|------|
| Between Groups | .000           | 2  | .000        | .043 | .959 |
| Within Groups  | .002           | 6  | .000        |      |      |
| Total          | .002           | 8  |             |      |      |

**ANOVA (48h)**

Silver content

|                | Sum of Squares | df | Mean Square | F    | Sig. |
|----------------|----------------|----|-------------|------|------|
| Between Groups | .000           | 2  | .000        | .146 | .867 |
| Within Groups  | .001           | 6  | .000        |      |      |
| Total          | .001           | 8  |             |      |      |

**ANOVA (72h)**

Silver content

|                | Sum of Squares | df | Mean Square | F     | Sig. |
|----------------|----------------|----|-------------|-------|------|
| Between Groups | .003           | 2  | .001        | 4.623 | .061 |
| Within Groups  | .002           | 6  | .000        |       |      |
| Total          | .004           | 8  |             |       |      |

Supplemental Table 1

**ANOVA (CTS-SF Ag0.5/SA)**

Silver content

|                | Sum of Squares | df | Mean Square | F     | Sig. |
|----------------|----------------|----|-------------|-------|------|
| Between Groups | .002           | 2  | .001        | 7.475 | .023 |
| Within Groups  | .001           | 6  | .000        |       |      |
| Total          | .002           | 8  |             |       |      |

**ANOVA (CTS-SF Ag1.0/SA)**

Silver content

|                | Sum of Squares | df | Mean Square | F      | Sig. |
|----------------|----------------|----|-------------|--------|------|
| Between Groups | .006           | 2  | .003        | 14.308 | .005 |
| Within Groups  | .001           | 6  | .000        |        |      |
| Total          | .008           | 8  |             |        |      |

**ANOVA (CTS-SF Ag2.0/SA)**

Silver content

|                | Sum of Squares | df | Mean Square | F     | Sig. |
|----------------|----------------|----|-------------|-------|------|
| Between Groups | .008           | 2  | .004        | 9.430 | .014 |
| Within Groups  | .002           | 6  | .000        |       |      |
| Total          | .010           | 8  |             |       |      |

Supplemental Table 2
